# Supplementary material for: Unveiling Nilaparvata lugens Stål Genes Defining Compatible and Incompatible Interactions with Rice through Transcriptome Analysis and Gene Silencing
Source: MDPI journal article supplement (doi:10.3390/cimb45080429), 2023-08-16
Supplement: s1 [file s1]

**Supplementary Table S2.** List of primers used to synthesize dsRNAs for the selected DEGs.

| <b>Gene name</b>  | <b>Forward sequence (5'-3')</b> | <b>Reverse sequence (5'-3')</b> |
|-------------------|---------------------------------|---------------------------------|
| <i>NlCP1</i>      | TCCACAAGAAACCACGCCTT            | GAGTAGCCGGATGAAGCGTA            |
| <i>NlCYP320a1</i> | CCTGAGGCTGAAGGACACTG            | ATCCAACCTCGGCGACCTTTT           |
| <i>NlCarE6</i>    | GCTTGGGACATCAAGGGACA            | TCTCTTCGGCATATTCGGGC            |
| <i>NlTret1</i>    | CTCGCGAACACTTCCGAAAC            | TAGAAGGCGGAGCGTGTTTT            |
| <i>GFP</i>        | CACAAGTTCAGCGTGTCCG             | GTTCACCTTGATGCCGTTCT            |
