# Supplementary material for: Unveiling Nilaparvata lugens Stål Genes Defining Compatible and Incompatible Interactions with Rice through Transcriptome Analysis and Gene Silencing
Source: MDPI journal article supplement (doi:10.3390/cimb45080429), 2023-08-16
Supplement: s1 [file s1]

**Supplementary Table S1.** List of primers used to evaluate the expression of the selected DEGs via RT-qPCR.

| Gene ID or name | Forward sequence (5'-3')  | Reverse sequence (5'-3') |
|-----------------|---------------------------|--------------------------|
| LOC111058179    | CTCGCGAACACTTCCGAAAC      | GATGGCCACGTTGCTTGAAC     |
| LOC111056854    | TTGAAGGACTTACCGGCTCG      | GTGGAGTCTGTGAACGGTCC     |
| LOC111064160    | AGAACCTCGGCATCCCTGAT      | GGCTCAACATTTCTCTCGCAC    |
| LOC111064061    | ATGTGTGCTTCTGAGAGGGC      | CAAGGAGCTTCACTGGAGGG     |
| LOC111060644    | AGGAAAACAAGGGCTACCTCG     | ATGGTTCCGTTGACAGGGTC     |
| LOC111046236    | CGTGAGATACGAGGGAGAAGG     | CGGCATACTTGGGTGCAGAATA   |
| LOC111046246    | GTCATCAAATACGCACCCGC      | TCGAATGATGTCCGCTGCTT     |
| LOC111059963    | TGTTGCGTTCACGGACTCG       | GGCCAAGTCTTCATGTCCTGT    |
| LOC111063850    | AAAACGTGACAACAGACGTG      | CCAGGTGAACCCGACATGAA     |
| LOC111052989    | TGCTGCATTTGTGAGGCAAC      | ATCACGTTGAACCCGACCTC     |
| <i>RPS15</i>    | TAAAAATGGCAGACGAAGAGCCCAA | TTCCACGGTTGAAACGTCTGCG   |
| <i>Tub</i>      | ACTCGTTCGGAGGAGGCACC      | GTTCCAGGGTGGTGTGGGTGGT   |
